# Supplementary material for: The 5-Item Modified Frailty Index Independently Predicts Morbidity in Patients Undergoing Instrumented Fusion following Extradural Tumor Removal
Source: PubMed Central journal article supplement — Spine Surg Relat Res. 2022 Aug 23;7(1):19–25. doi: 10.22603/ssrr.2022-0102 (PMC9931415; doi:10.22603/ssrr.2022-0102), 2022-08-23
Supplement: 2432-261X-7-0019-s001.pdf [file 2432-261X-7-0019-s001.pdf]

### Appendix A. Five-item Modified Frailty Index (mFI-5) Scoring System

| <b>Risk factor</b>                                                          | <b>Points</b> |
|-----------------------------------------------------------------------------|---------------|
| <i>Congestive heart failure in the 30 days before surgery</i>               | 1             |
| <i>History of severe chronic obstructive pulmonary disease or pneumonia</i> | 1             |
| <i>Hypertension requiring medication</i>                                    | 1             |
| <i>Diabetes mellitus with oral agents or insulin</i>                        | 1             |
| <i>Non-independent functional health status at the time of surgery</i>      | 1             |
| <b>Total</b>                                                                | <b>5</b>      |

## Appendix B. Inclusion and Exclusion Criteria

| Criteria                                                                  | Relevant CPT code or NSQIP variable        |
|---------------------------------------------------------------------------|--------------------------------------------|
| *Extradural tumor removal (n = 3744)                                      | CPT-63275, CPT-63276, CPT-63277, CPT-63278 |
| Without relevant instrumentation coding (n= 2021)                         | CPT-22840, CPT-22842, CPT-22843            |
| With corpectomy for tumor removal coding (n = 29)                         | CPT-63300-63308                            |
| With intradural extramedullary coding (n = 1)                             | CPT-63280-3                                |
| Surgical specialty other than neurosurgery or orthopedic surgery (n = 28) | “SURGSPEC”                                 |
| Without disseminated cancer (n = 600)                                     | “DISCANCR”                                 |
| Missing readmission data (n = 158)                                        | N/A                                        |

All relevant inclusion and exclusion criteria applied to the NSQIP dataset. Asterisk (\*) indicates inclusion criteria.
